# Supplementary material for: Biomimetic oxidation of pyrene and related aromatic hydrocarbons. Unexpected electron accepting abilities of pyrenequinones
Source: Royal Society of Chemistry journal article supplement (doi:10.1039/c4cc04026k), 2014-01-01
Supplement: c4cc04026k1.pdf [file c4cc04026k1.pdf]

## **Biomimetic oxidation of pyrene and related aromatic hydrocarbons. Unexpected electron accepting abilities of pyrenequinones.**

Alejandro López-Moreno,<sup>a</sup> David Clemente-Tejeda,<sup>b</sup> Joaquín Calbo,<sup>c</sup> Atena Naeimi,<sup>a,d</sup> Francisco Bermejo,<sup>b</sup> Enrique Ortí<sup>\*c</sup> and Emilio M. Pérez<sup>\*a</sup>

<sup>a</sup> IMDEA Nanoscience, C/ Faraday 9, Ciudad Universitaria de Cantoblanco, 28049, Madrid, Spain. Fax: (+) 34 91 2998730; E-mail: emilio.perez@imdea.org

<sup>b</sup> Departamento de Química Orgánica, Facultad de Ciencias Químicas. Pza. de los Caídos 1-5, 37008, Salamanca, Spain.

<sup>c</sup> Instituto de Ciencia Molecular, Universidad de Valencia, E-46980 Paterna, Spain. E-Mail: enrique.orti@uv.es

<sup>d</sup> University of Jiroft, Department of Chemistry, Jiroft, Iran.

### **Experiment Section**

General Consideration: NMR spectra were recorded with BRUKER AVANCE III-HD NANOBAIY 300MHz and BRUKER DRX 500MHz. Mass spectra were measured with ULTRAFLEX III (MALDI-TOF/TOF). Electrochemistry was measured with Potentiostat Autolab PGSTAT 30.

All materials used for synthesis were obtained from Sigma-Aldrich or Alfa Aesar. All organic solvents for synthesis were of analytical grade and were obtained commercially. They were used without further purification. All reactions were monitored by thin-layer chromatography (TLC) with Merck silica gel plates (60F-254) under irradiation by UV-lamp (254 nm). Scharlau silica gel (230-400 mesh) was used in the column-chromatography purification.

### **EXPERIMENTAL PROCEDURE (5% OF CATALYST)**

A 100 mL round bottom flask was charged with 0.5 mL of CH<sub>2</sub>Cl<sub>2</sub>, 1.5 mL of a 0.33 M AcOH solution in CH<sub>3</sub>CN, Fe(bpmen)(OTf)<sub>2</sub> (9 mg, 0.016 mmol, 1.6 mol %) and pyrene (200 mg, 1 mmol, 1.0 equiv). The solution was stirred vigorously at room temperature. A solution of H<sub>2</sub>O<sub>2</sub> (30 wt %, 0.136 mL, 1.2 mmol, 1.2 equiv) in CH<sub>3</sub>CN (8 mL, 0.13 M) was added dropwise via syringe. After stirring for 10 min, 1 mL of a 0.5

M AcOH solution in CH<sub>3</sub>CN and Fe(bpmen)(OTf)<sub>2</sub> (9 mg, 0.016 mmol, 1.6 mol %) were added. This was followed by the dropwise addition of H<sub>2</sub>O<sub>2</sub> (30 wt %, 0.136 mL, 1.2 mmol, 1.2 equiv) in CH<sub>3</sub>CN (8 mL, 0.13 M). A third addition was performed for a total of 5 mol % Fe(bpmen)(OTf)<sub>2</sub>, 1.5 equiv of AcOH, and 3.6 equivalents of H<sub>2</sub>O<sub>2</sub>. After the last 10 min of stirring, a NaHCO<sub>3</sub> saturated aqueous solution was added and the mixture was extracted with ethyl acetate. The combined organic layers were dried over anhydrous Mg<sub>2</sub>SO<sub>4</sub>, evaporated under reduced pressure and purified by chromatographic column (H:AcOEt 7:3) to obtain 121 mg of pyrene, 32 mg (14%) of 1,6-pyrenedione and 18.2 mg (8%) of 1,8-pyrenedione.

#### EXPERIMENTAL PROCEDURE (10% OF CATALYST)

A 100 mL round bottom flask was charged with 0.5 mL of CH<sub>2</sub>Cl<sub>2</sub>, 1.5 mL of a 0.33 M AcOH solution in CH<sub>3</sub>CN, Fe(bpmen)(OTf)<sub>2</sub> (20 mg, 0.033 mmol, 3.3 mol %), and pyrene (200 mg, 1 mmol, 1.0 equiv). The solution was stirred vigorously at room temperature. A solution of H<sub>2</sub>O<sub>2</sub> (30 wt %, 0.136 mL, 1.2 mmol, 1.2 equiv) in CH<sub>3</sub>CN (8 mL, 0.13 M) was added dropwise via syringe. After stirring for 10 min, 1 mL of a 0.5 M AcOH solution in CH<sub>3</sub>CN and Fe(bpmen)(OTf)<sub>2</sub> (20 mg, 0.033 mmol, 3.3 mol %) were added. This was followed by the dropwise addition of H<sub>2</sub>O<sub>2</sub> (30 wt %, 0.136 mL, 1.2 mmol, 1.2 equiv) in CH<sub>3</sub>CN (8 mL, 0.13 M). A third addition was performed for a total of 10 mol % Fe(bpmen)(OTf)<sub>2</sub>, 1.5 equiv of AcOH and 3.6 equiv of H<sub>2</sub>O<sub>2</sub>. After the last 10 min of stirring, a NaHCO<sub>3</sub> saturated aqueous solution was added and the mixture was extracted with ethyl acetate. The combined organic layers were dried over anhydrous Mg<sub>2</sub>SO<sub>4</sub>, evaporated under reduced pressure and purified by chromatographic column (H:AcOEt 7:3) to obtain 98 mg of pyrene, 40 mg (17%) of 1,6-pyrenedione and 20 mg (9%) of 1,8-pyrenedione.

#### EXPERIMENTAL PROCEDURE (15% OF CATALYST)

A 100 mL round bottom flask was charged with 0.5 mL of CH<sub>2</sub>Cl<sub>2</sub>, 1.5 mL of a 0.33 M AcOH solution in CH<sub>3</sub>CN, Fe(bpmen)(OTf)<sub>2</sub> (31.2 mg, 0.05 mmol, 5 mol %) and pyrene (200 mg, 1 mmol, 1.0 equiv). The solution was stirred vigorously at room temperature. A solution of H<sub>2</sub>O<sub>2</sub> (30 wt %, 0.136 mL, 1.2 mmol, 1.2 equiv) in CH<sub>3</sub>CN

(8 mL, 0.13 M) was added dropwise via syringe. After stirring for 10 min, 1 mL of a 0.5 M AcOH solution in CH<sub>3</sub>CN and Fe(bpmen)(OTf)<sub>2</sub> (31.2 mg, 0.05 mmol, 5 mol %) were added. This was followed by the dropwise addition of H<sub>2</sub>O<sub>2</sub> (30 wt %, 0.136 mL, 1.2 mmol, 1.2 equiv) in CH<sub>3</sub>CN (8 mL, 0.13 M). A third addition was performed for a total of 15 mol % Fe(bpmen)(OTf)<sub>2</sub>, 1.5 equiv of AcOH and 3.6 equiv of H<sub>2</sub>O<sub>2</sub>. After the last 10 min of stirring, a NaHCO<sub>3</sub> saturated aqueous solution was added and the mixture was extracted with ethyl acetate. The combined organic layers were dried over anhydrous Mg<sub>2</sub>SO<sub>4</sub>, evaporated under reduced pressure and purified by chromatographic column (H:AcOEt 7:3) to obtain 62 mg of pyrene, 68 mg (29%) of 1,6-pyrenedione, 36.5 mg (16%) of 1,8-pyrenedione and 11 mg (5%) of 4,5-pyrenedione.

#### EXPERIMENTAL PROCEDURE (20% OF CATALYST)

A 100 mL round bottom flask was charged with 0.5 mL of CH<sub>2</sub>Cl<sub>2</sub>, 1.5 mL of a 0.33 M AcOH solution in CH<sub>3</sub>CN, Fe(bpmen)(OTf)<sub>2</sub> (42 mg, 0.067 mmol, 6.7 mol %), and pyrene (200 mg, 1 mmol, 1.0 equiv). The solution was stirred vigorously at room temperature. A solution of H<sub>2</sub>O<sub>2</sub> (30 wt %, 0.136 mL, 1.2 mmol, 1.2 equiv) in CH<sub>3</sub>CN (8 mL, 0.13 M) was added dropwise via syringe. After stirring for 10 min, 1 mL of a 0.5 M AcOH solution in CH<sub>3</sub>CN and Fe(bpmen)(OTf)<sub>2</sub> (42 mg, 0.067 mmol, 6.7 mol %) were added. This was followed by the dropwise addition of H<sub>2</sub>O<sub>2</sub> (30 wt %, 0.136 mL, 1.2 mmol, 1.2 equiv) in CH<sub>3</sub>CN (8 mL, 0.13 M). A third addition was performed for a total of 20 mol % Fe(bpmen)(OTf)<sub>2</sub>, 1.5 equiv of AcOH and 3.6 equiv of H<sub>2</sub>O<sub>2</sub>. After the last 10 min of stirring, a NaHCO<sub>3</sub> saturated aqueous solution was added and the mixture was extracted with ethyl acetate. The combined organic layers were dried over anhydrous Mg<sub>2</sub>SO<sub>4</sub>, evaporated under reduced pressure and purified by chromatographic column (H:AcOEt 7:3) to obtain 43 mg of pyrene, 34 mg (15%) of 1,6-pyrenedione and 20.2 mg (9%) of 1,8-pyrenedione.

The reactions of anthracene, naphthlene, phenantrene, and benzene were carried out using the 15% of catalyst procedure.

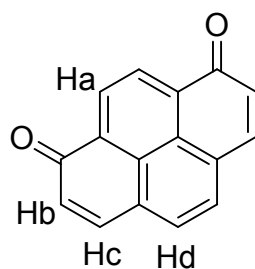

$^1\text{H}$  NMR (300 MHz,  $\text{CDCl}_3$ )  $\delta$  8.64 (s, 2H, Ha), 7.67 (d, 2H,  $J = 9.8$  Hz, Hc), 7.67 (s, 2H, Hd), 6.68 (d, 2H,  $J = 9.8$  Hz, Hb).

$^{13}\text{C}$  NMR (125 MHz,  $\text{CDCl}_3$ )  $\delta$  185.2, 141.5, 132.3, 131.2, 131.1, 129.6, 129.5, 127.6.

MS  $m/z$ : calcd. for  $\text{C}_{16}\text{H}_8\text{O}_2$  [ $\text{M}+2\text{H}^+$ ] 234.06, found MALDI-TOF 234.1

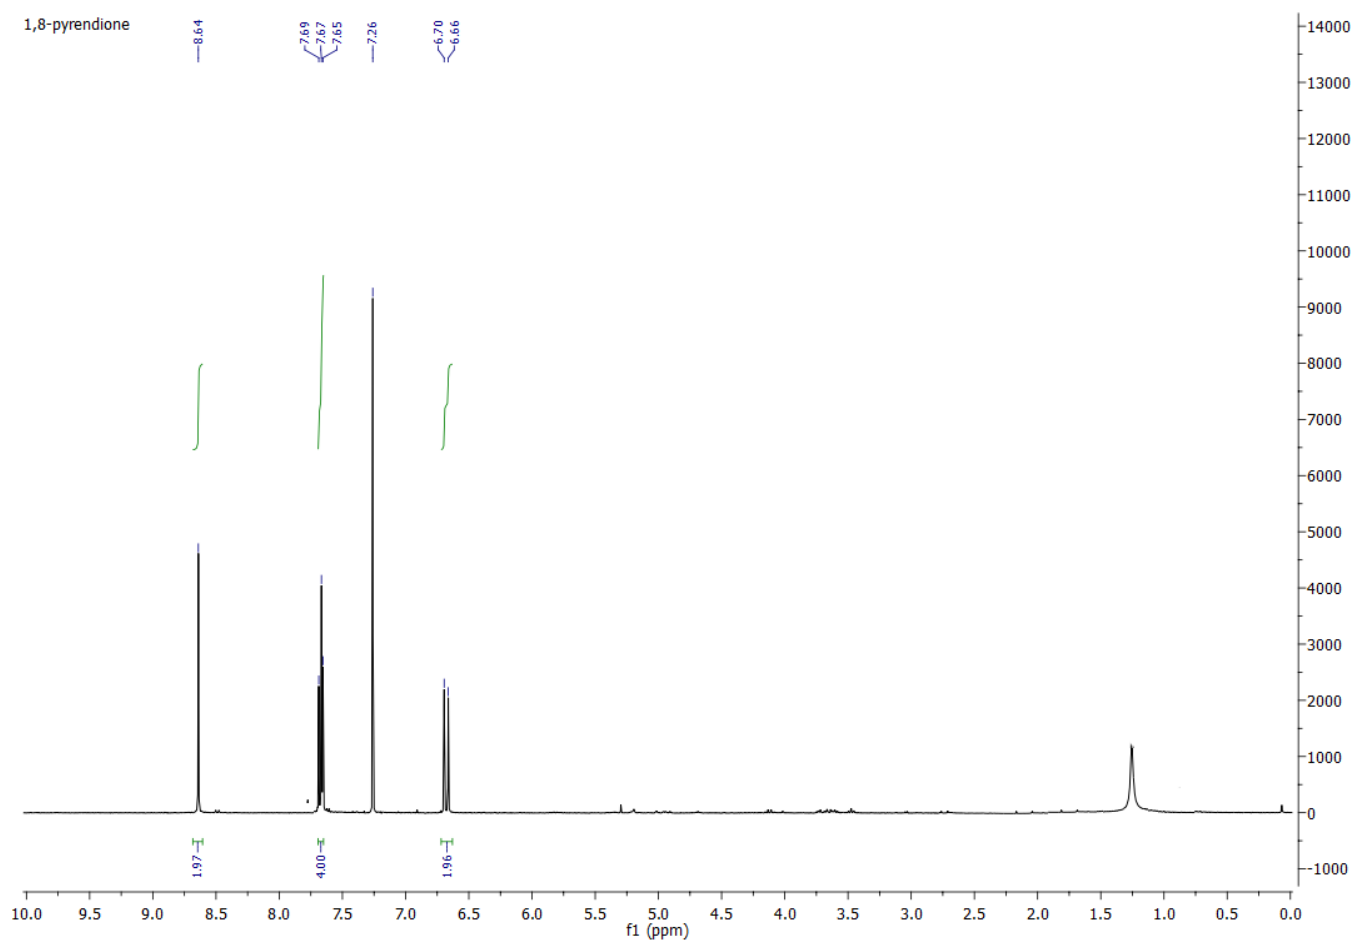

1,8-pyrendione

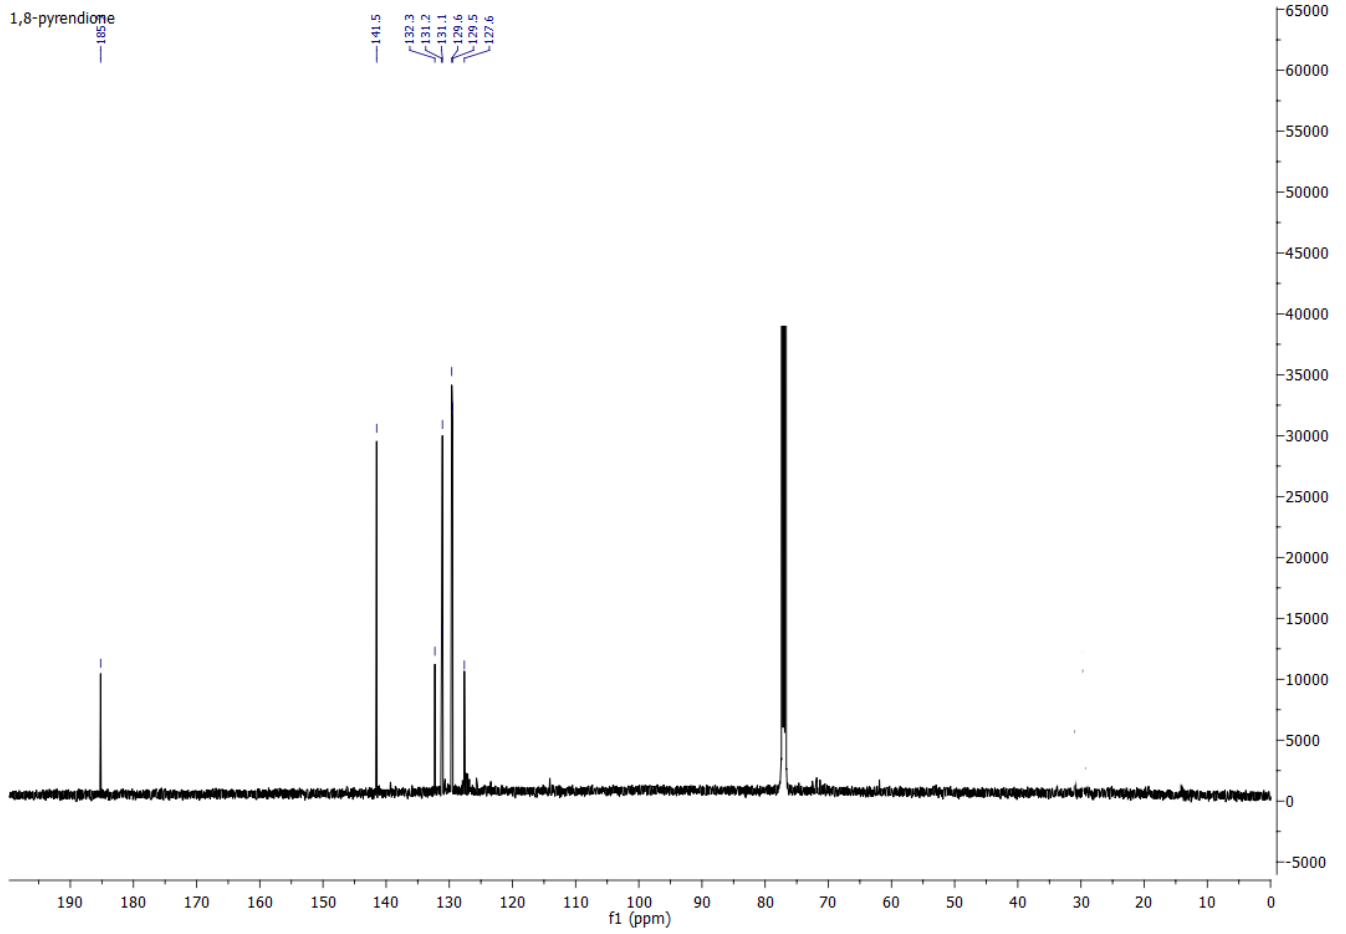

Muestra **AL1,8**  
Matriz Ditranol

Ensayo MALDI (ULTRAFLEX III)  
D:\Data\Placas MALDI\U-037\O9- AL1,8 Ditranol\0\_09\1

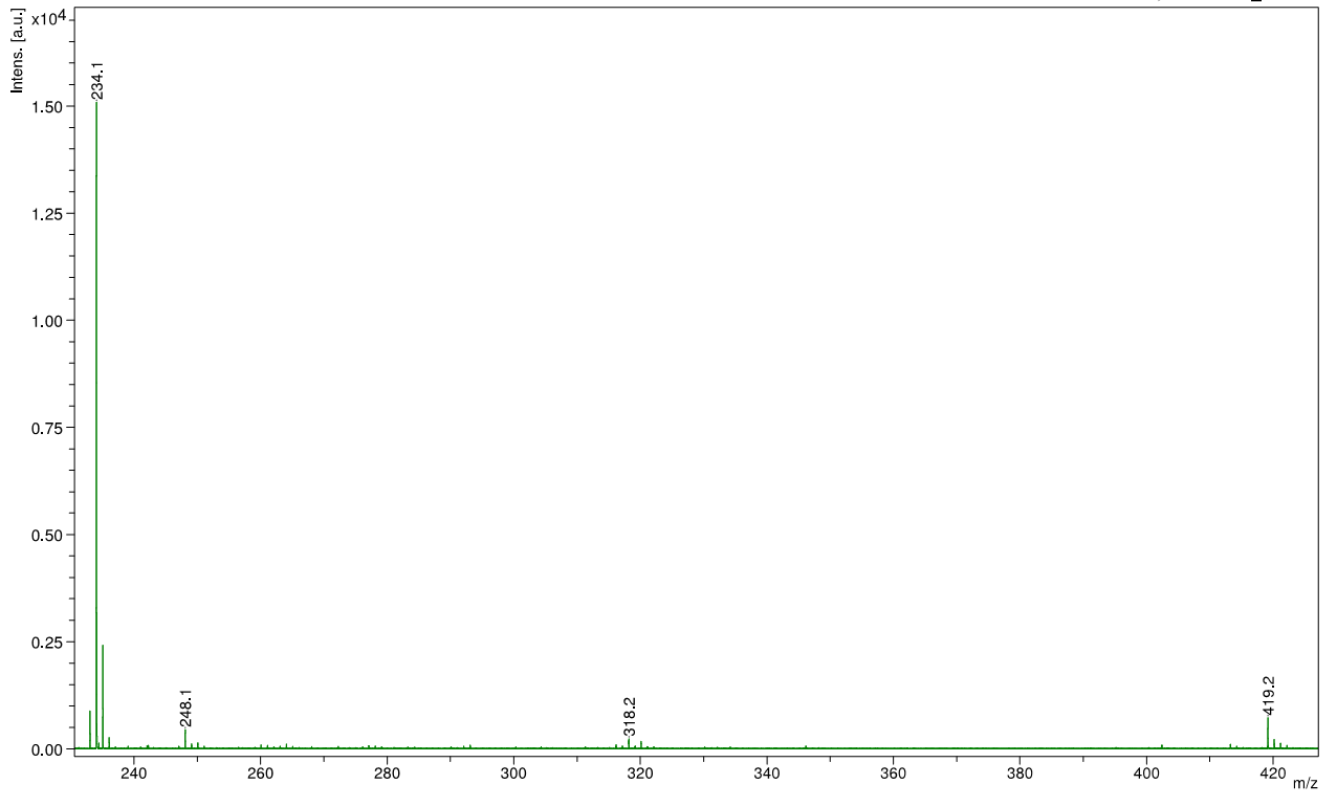

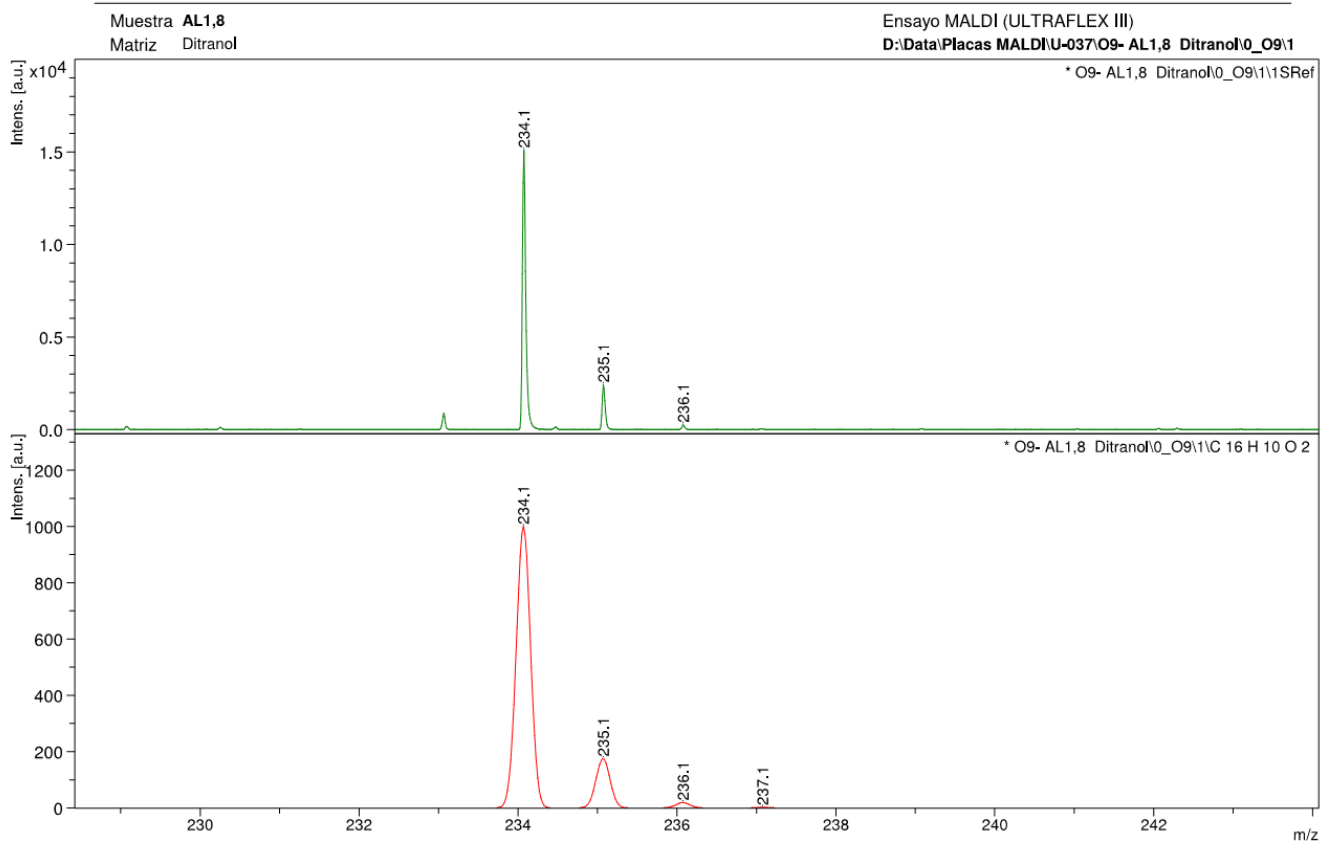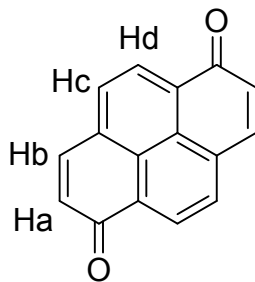

<sup>1</sup>H NMR (300 MHz, CDCl<sub>3</sub>)  $\delta$  8.49 (d,  $J = 7.5$  Hz, 2H, Hd), 7.83 (d,  $J = 7.5$  Hz, 2H, Hc), 7.68 (d,  $J = 9.8$  Hz, 2H, Hb), 6.71 (d,  $J = 9.8$  Hz, 2H, Ha).

<sup>13</sup>C NMR (75 MHz, CDCl<sub>3</sub>)  $\delta$  185.5, 141.2, 133.9, 130.9, 130.8, 130.4, 130.2, 127.7.

MS m/z: calcd. for C<sub>16</sub>H<sub>8</sub>O<sub>2</sub> [M+2H<sup>+</sup>] 234.06 found MALDI-TOF 234.1

1,6-pyrendione

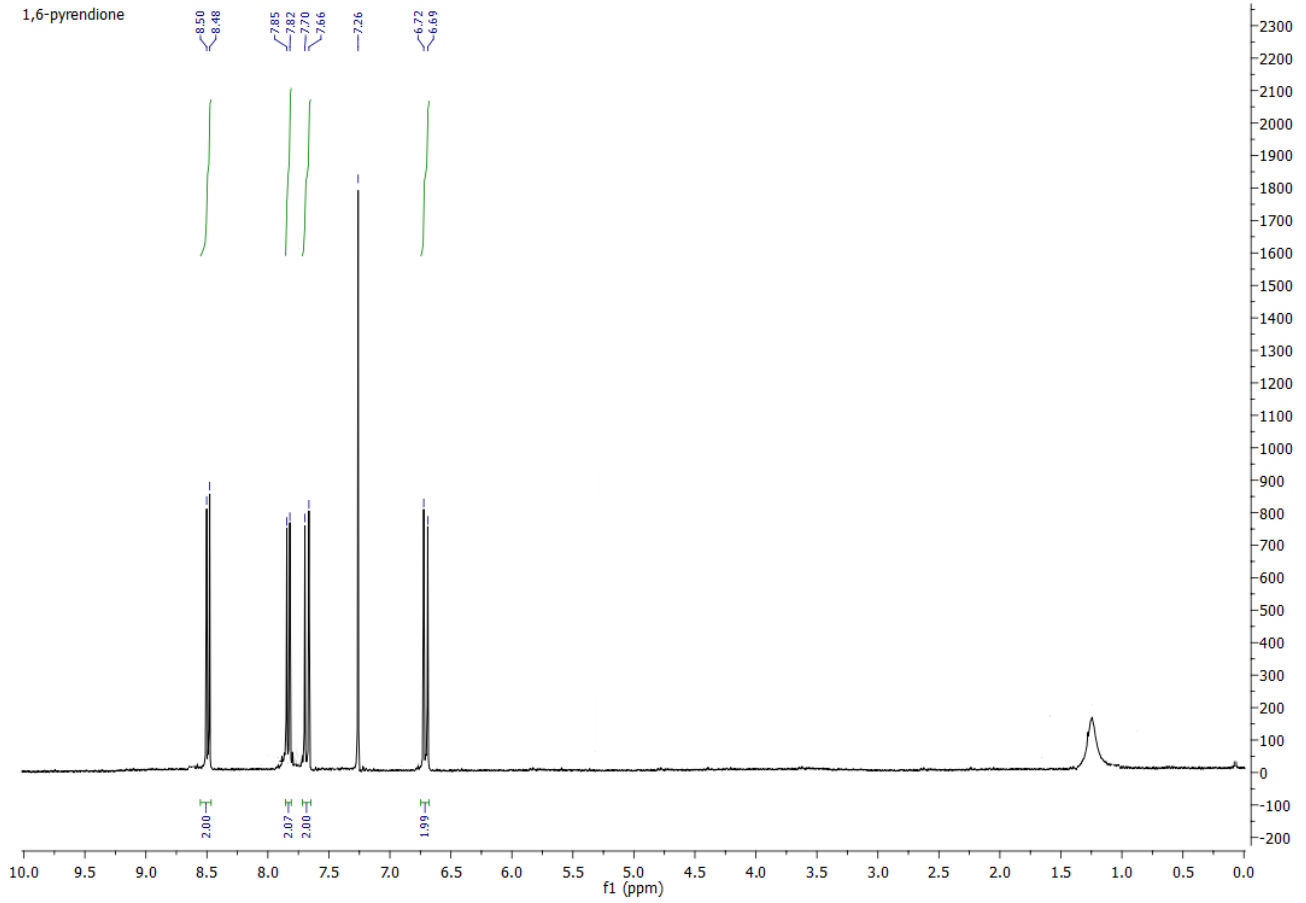

1,6-pyrendione

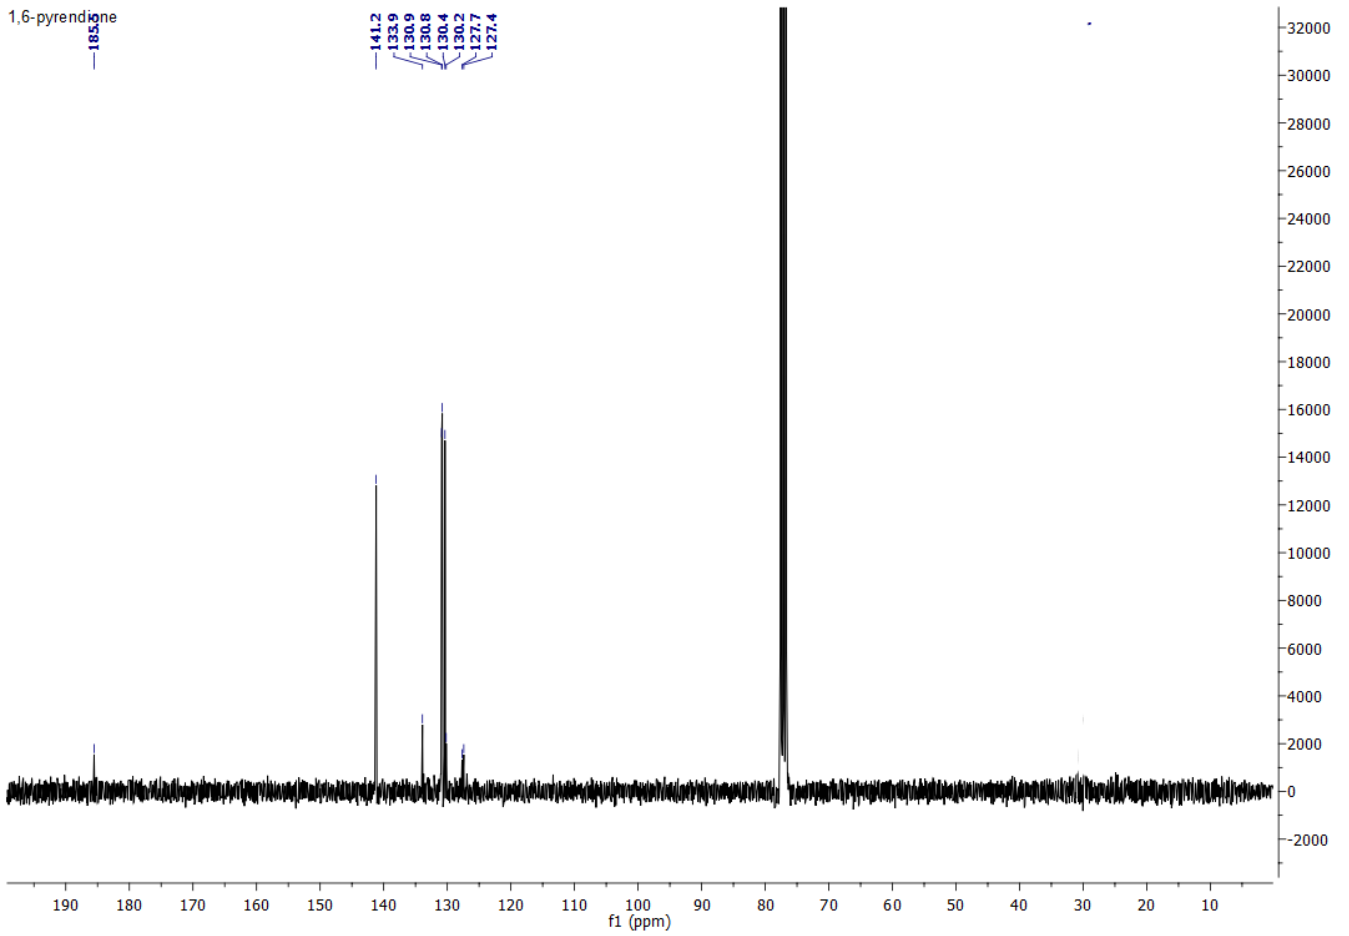

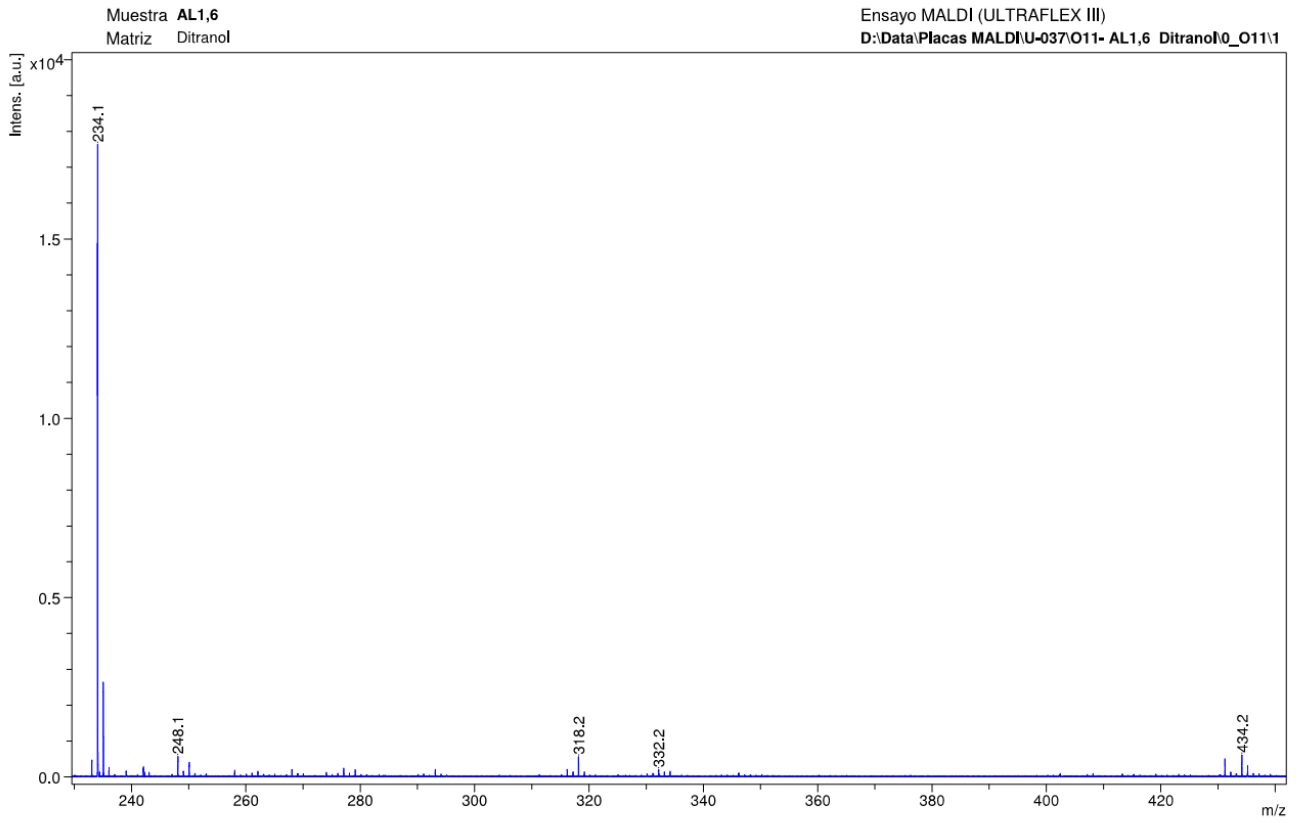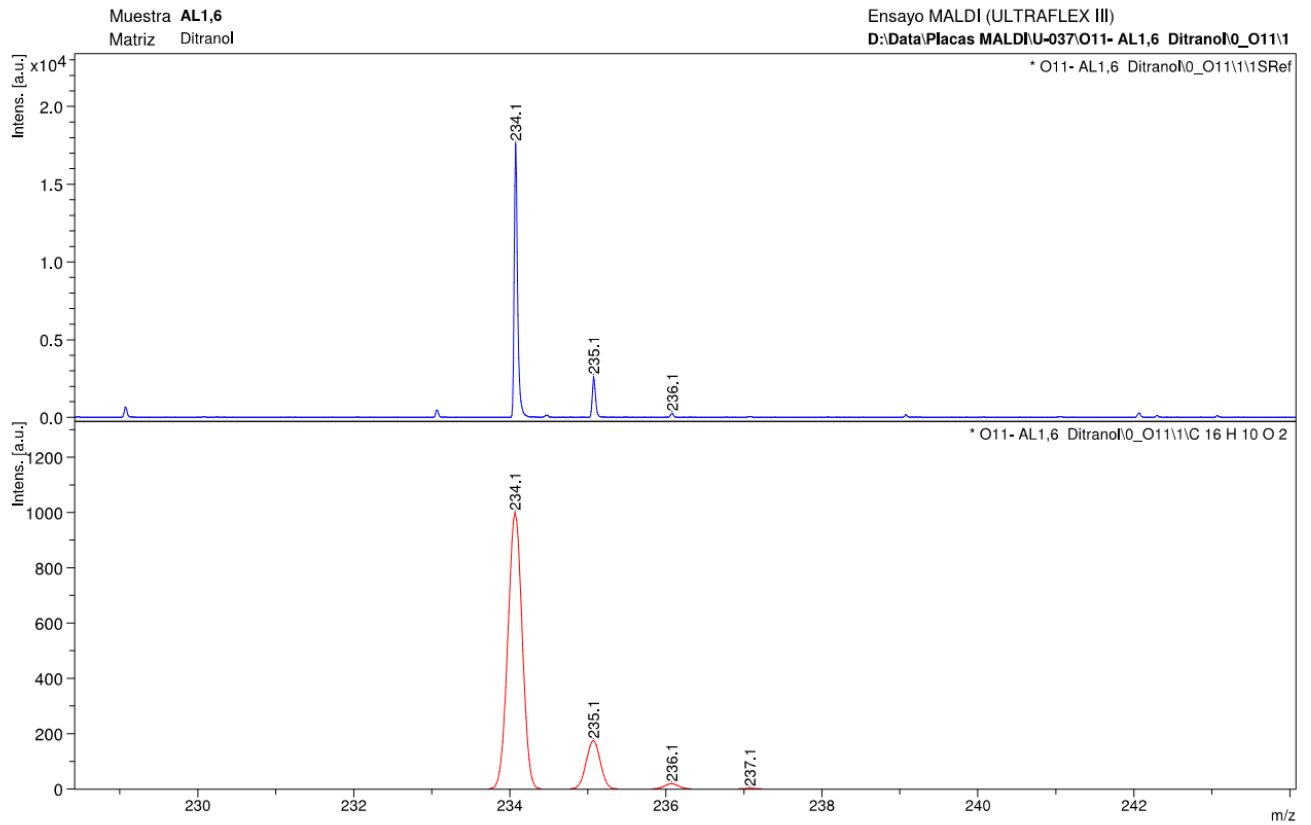



1: Scan ES+  
1.25e8

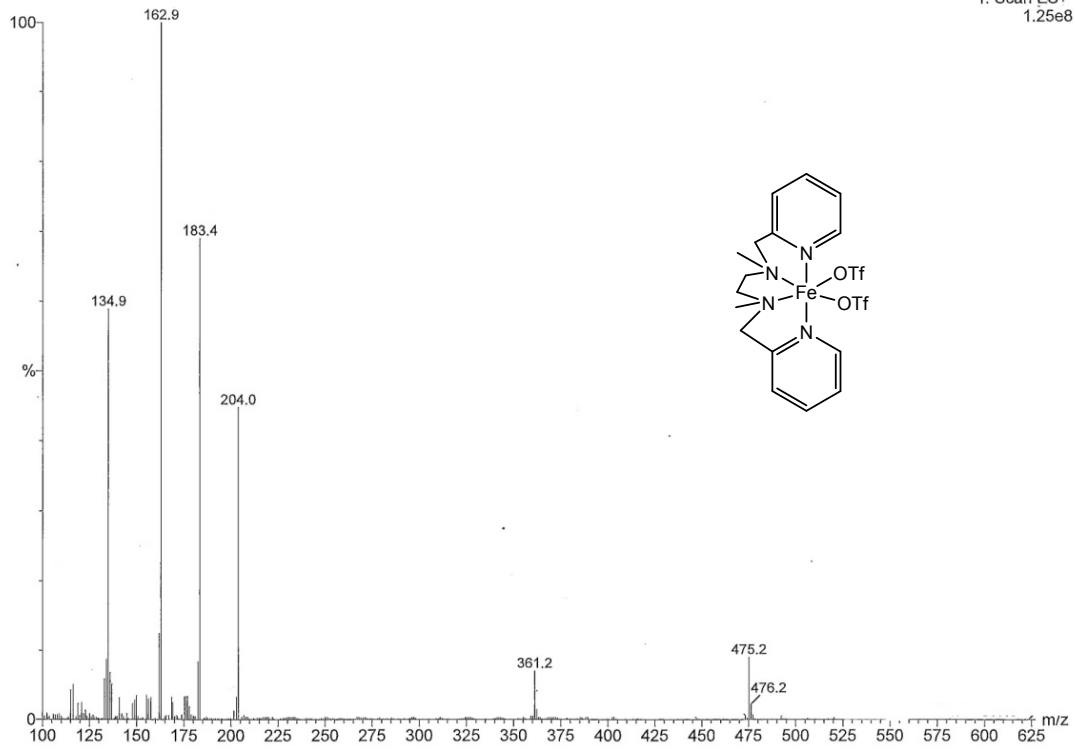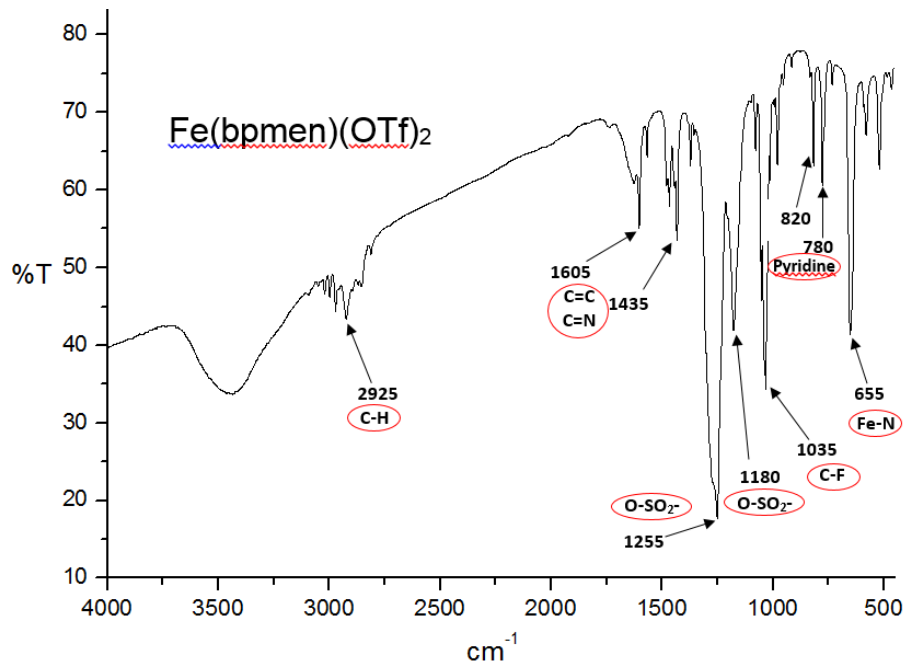

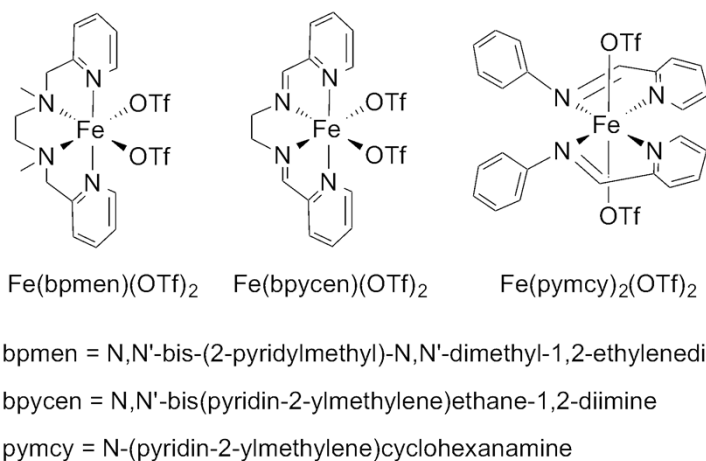

Figure S1. Iron Catalysts.  $\text{Fe}(\text{bpmen})(\text{OTf})_2$  was synthesized following previous work.<sup>1</sup>  $\text{Fe}(\text{bpycen})(\text{OTf})_2$  and  $\text{Fe}(\text{pymcy})_2(\text{OTf})_2$  were synthesized following previous work.<sup>2</sup>

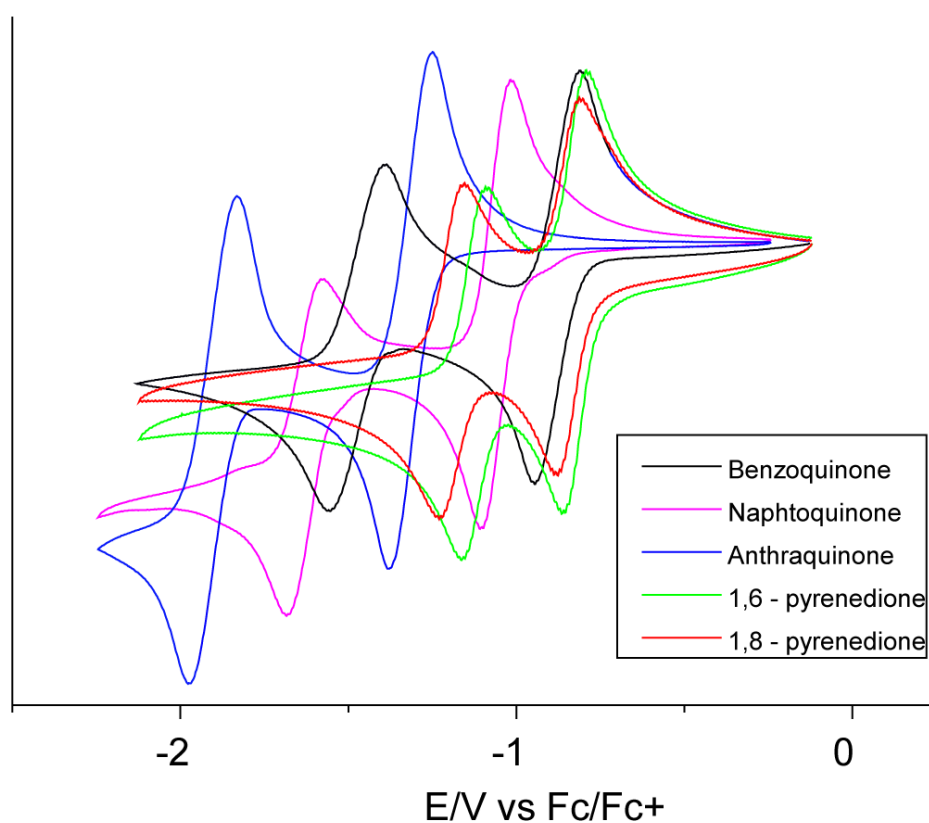

Figure S2. Cyclic voltammograms of benzoquinone, naphtoquinone, anthraquinone and pyrenequinones.

## Computational details

All the calculations were carried out using the Gaussian 09 (version D01) program package.<sup>3</sup> Full-geometry optimization of both neutral and anion species of parent *p*-benzoquinone (*p*-BQ) and pyrenediones **1** and **2** was performed with the Becke's three parameter B3LYP exchange-correlation functional<sup>4, 5</sup> and the cc-pVTZ Dunning's basis set.<sup>6</sup> The anions were calculated as open-shell doublet systems using the unrestricted UB3LYP approach. Even though no special symmetry restriction was imposed during the optimization process, minimum-energy conformations of  $C_{2h}$  and  $C_{2v}$  symmetry were obtained for **1** and **2**, respectively, in both neutral and reduced states. To calculate the free energy of solvation ( $\Delta\Delta G_{\text{solv}}$ ) of the one-electron attachment  $A + e^- \rightarrow A^-$  reaction, single-point B3LYP/cc-pVTZ energy calculations were performed for *p*-BQ and the two pyrenediones in the presence of the solvent (acetonitrile,  $\epsilon = 35.688$ ) within the SCRF (self-consistent reaction field) theory using the polarized continuum model (PCM).<sup>7, 8</sup> The PCM model considers the solvent as a continuous medium with a dielectric constant  $\epsilon$ , and represents the solute by means of a cavity built with a number of interlaced spheres. Other continuum solvation models such as the conductor-like PCM (CPCM)<sup>9, 10</sup> and SMD<sup>11</sup> were used to compare the effect of the solvation model on the free energy of solvation.

Table S1 presents the thermochemical and electrochemical data calculated for the one-electron attachment  $A + e^- \rightarrow A^-$  process depicted in Figure S3, where A stands for *p*-BQ and pyrenediones **1** and **2**. Thermodynamic data were computed both at the B3LYP/cc-pVTZ level and by means of the more accurate Gaussian-3 theory using reduced Moller-Plesset order (G3(MP2)).<sup>12</sup> The G3(MP2) theory is based on MP2(full)/6-31G(d)-optimized geometries using all electrons and a series of single-point energy calculations at higher levels of theory. An accurate estimation of the total energy is performed by a QCISD(T)/6-31G(d) calculation followed by a series of corrections according to the formula:

$$E_0[\text{G3(MP2)}] = \text{QCISD(T)/6-31G(d)} + \Delta E_{\text{MP2}} + \Delta E(\text{SO}) + E(\text{ZPE}) + E(\text{HLC})$$

where the correction at the second-order Moller-Plesset level is given by

$$\Delta E_{\text{MP2}} = [E(\text{MP2/G3MP2large})] - [E(\text{MP2/6-31G(d)})],$$

the spin-orbit correction,  $\Delta E(\text{SO})$ , is included for atomic species only and the zero-point correction,  $E(\text{ZPE})$ , is obtained from scaled (0.8929) HF/6-31G(d) frequencies. Finally, a higher level correction,  $E(\text{HLC})$ , is added to take into account remaining deficiencies in the energy calculations.

Table S2 compares the solvation free energy differences ( $\Delta\Delta G_{\text{solv}}$ ) between the neutral and the anion species of *p*-BQ, **1** and **2** computed at the B3LYP/cc-pVTZ level using different solvation models. The three models employed lead to identical trends with similar relative values.

Table S1. Thermochemical (in eV) and electrochemical (in V) data calculated for the one-electron attachment  $\text{A} + \text{e}^- \rightarrow \text{A}^-$  process depicted in Figure S3.

|                                        | B3LYP/cc-pVTZ |          |          | G3(MP2) |          |          |
|----------------------------------------|---------------|----------|----------|---------|----------|----------|
|                                        | BQ            | <b>1</b> | <b>2</b> | BQ      | <b>1</b> | <b>2</b> |
| EA <sup>a</sup>                        | 1.943         | 2.312    | 2.302    | 1.852   | 2.230    | 2.254    |
| EA + ZPE <sup>b</sup>                  | 1.993         | 2.374    | 2.366    | 1.916   | 2.322    | 2.341    |
| EA + ZPE + 298K <sup>c</sup>           | 1.999         | 2.376    | 2.368    | 1.923   | 2.324    | 2.344    |
| $\Delta H_{\text{g},298\text{K}}^d$    | -1.999        | -2.376   | -2.368   | -1.923  | -2.324   | -2.344   |
| $\Delta S_{\text{g},298\text{K}}^e$    | 0.017         | 0.693    | 0.715    | -0.347  | 0.453    | 0.322    |
| $\Delta G_{\text{g},298\text{K}}^f$    | -2.000        | -2.385   | -2.377   | -1.919  | -2.330   | -2.348   |
| $\Delta G_{\text{g,corrected}}^g$      | -2.146        | -2.531   | -2.523   | -2.065  | -2.476   | -2.494   |
| $\Delta G_{\text{solv}}(\text{A})^h$   | -0.223        | -0.323   | -0.331   |         |          |          |
| $\Delta G_{\text{solv}}(\text{A}^-)^h$ | -2.245        | -1.940   | -1.954   |         |          |          |
| $\Delta\Delta G_{\text{solv}}^i$       | -2.023        | -1.617   | -1.623   | -2.023  | -1.617   | -1.623   |
| $\Delta G_{\text{red}}^j$              | -4.169        | -4.148   | -4.146   | -4.088  | -4.093   | -4.117   |
| $E_{1/2,\text{absolute}}^k$            | 4.169         | 4.148    | 4.146    | 4.088   | 4.093    | 4.117    |
| $E_{1/2,\text{relative}}^l$            | -0.819        | -0.840   | -0.842   | -0.900  | -0.895   | -0.871   |

<sup>a</sup> Adiabatic electron affinities calculated as the energy difference between the total energies computed for the neutral and the anion species at their respective fully-optimized geometries.

<sup>b</sup> Adiabatic electron affinities including the zero-point energy (ZPE).

<sup>c</sup> Adiabatic electron affinities including the ZPE and the correction at 298 K to the internal thermal energy ( $E_{\text{tot}} = E_{\text{trans}} + E_{\text{rot}} + E_{\text{vib}} + E_{\text{elec}}$ ).

<sup>d</sup> Enthalpy difference between the anion and the neutral species for the one-electron attachment reaction depicted in Figure S4.

<sup>e</sup> Entropy difference for the one-electron attachment reaction. Values expressed in cal/K·mol.

<sup>f</sup> Free energy difference for the one-electron attachment reaction in gas phase.  
 $\Delta G_{\text{g},298\text{K}} = \Delta H_{\text{g},298\text{K}} - T\Delta S_{\text{g},298\text{K}}$

<sup>g</sup> Corrected values taking into account the free electron as an ideal monoatomic gas,  $5/2 RT$ ,<sup>13</sup> and the correction for the change in standard state from 1 atm to  $1 \text{ mol}\cdot\text{L}^{-1}$ ,<sup>14</sup> according to the following formula:<sup>15</sup>  $\Delta G_{\text{g,corrected}} = \Delta G_{\text{g},298\text{K}} - 5/2 RT + RT \ln 24.46$ .

<sup>h</sup> Free energy of solvation for the neutral (A) and the anion (A<sup>-</sup>) species (see Figure S1). Values are calculated at the B3LYP/cc-pVTZ level using the polarized continuum model (PCM) with acetonitrile as solvent. Minimum-energy geometries in gas phase at the same level of theory are employed.

<sup>i</sup> Free energy of solvation for the one-electron attachment reaction defined as follows:  $\Delta\Delta G_{\text{solv}} = \Delta G_{\text{solv}}(\text{A}^-) - \Delta G_{\text{solv}}(\text{A})$ .

<sup>j</sup> Free energy difference in solution for the thermodynamic cycle shown in Figure S1.  $\Delta G_{\text{red}} = \Delta G_{\text{g},298\text{K}} + \Delta\Delta G_{\text{solv}}$

<sup>k</sup> Absolute first half-wave reduction potentials.  $E_{1/2} = \Delta G_{\text{red}}/(-1 \times F)$

<sup>l</sup> First half-wave reduction potentials with respect to ferrocene/ferricenium.  $E_{\text{ref}} = -4.99$  V (reduction potential of Fc/Fc<sup>+</sup>).<sup>16</sup>

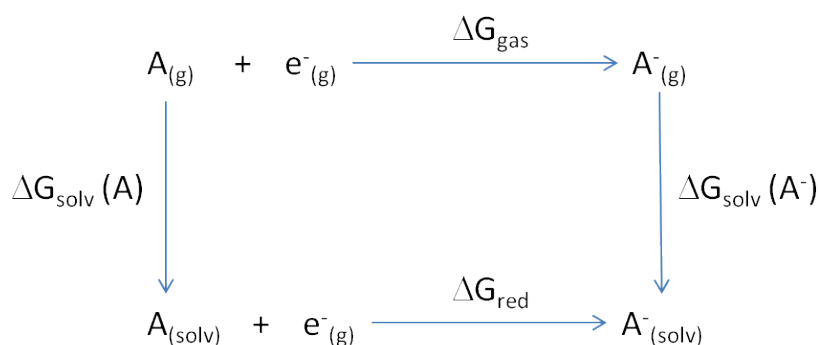

$$\Delta\Delta G_{\text{solv}} = \Delta G_{\text{solv}}(\text{A}^-) - \Delta G_{\text{solv}}(\text{A})$$

Figure S4. Thermodynamic cycle for the analysis of solution effects on the one-electron attachment  $\text{A} + \text{e}^- \rightarrow \text{A}^-$  reaction.

Table S2. Solvation free energy differences ( $\Delta\Delta G_{\text{solv}}$ ) in eV between the neutral and the anion species of *p*-BQ, **1** and **2** computed at the B3LYP/cc-pVTZ level using different solvation models and the B3LYP/cc-pVTZ minimum-energy geometries.

|      | <i>p</i> -BQ | <b>1</b> | <b>2</b> |
|------|--------------|----------|----------|
| PCM  | -2.023       | -1.617   | -1.623   |
| CPCM | -2.022       | -1.618   | -1.625   |
| SMD  | -1.823       | -1.447   | -1.455   |

## References

1. D. Clemente-Tejeda, A. López-Moreno and F. A. Bermejo, *Tetrahedron*, 2012, **68**, 9249-9255.
2. P. Shejwalkar, N. P. Rath and E. B. Bauer, *Dalton Transactions*, 2011, **40**, 7617-7631.
3. M. J. Frisch, G. W. Trucks, H. B. Schlegel, G. E. Scuseria, M. A. Robb, J. R. Cheeseman, G. Scalmani, V. Barone, B. Mennucci, G. A. Petersson, H. Nakatsuji, M. Caricato, X. Li, H. P. Hratchian, A. F. Izmaylov, J. Bloino, G. Zheng, J. L. Sonnenberg, M. Hada, M. Ehara, K. Toyota, R. Fukuda, J. Hasegawa, M. Ishida, T. Nakajima, Y. Honda, O. Kitao, H. Nakai, T. Vreven, J. A. Montgomery, J. E. Peralta, F. Ogliaro, M. Bearpark, J. J. Heyd, E. Brothers, K. N. Kudin, V. N. Staroverov, R. Kobayashi, J. Normand, K. Raghavachari, A. Rendell, J. C. Burant, S. S. Iyengar, J. Tomasi, M. Cossi, N. Rega, J. M. Millam, M. Klene, J. E. Knox, J. B. Cross, V. Bakken, C. Adamo, J. Jaramillo, R. Gomperts, R. E. Stratmann, O. Yazyev, A. J. Austin, R. Cammi, C. Pomelli, J. W. Ochterski, R. L. Martin, K. Morokuma, V. G. Zakrzewski, G. A. Voth, P. Salvador, J. J. Dannenberg, S. Dapprich, A. D. Daniels, Farkas, J. B. Foresman, J. V. Ortiz, J. Cioslowski and D. J. Fox, *Gaussian 09, Revision A.02*, (2009).
4. A. D. Becke, *The Journal of Chemical Physics*, 1993, **98**, 5648-5652.
5. C. Lee, W. Yang and R. G. Parr, *Physical Review B*, 1988, **37**, 785-789.
6. R. Kendall, T. Dunning and R. Harrison, *The Journal of Chemical Physics*, 1992, **96**, 6796-6806.
7. J. Tomasi, B. Mennucci and R. Cammi, *Chemical Reviews (Washington, DC, United States)*, 2005, **105**, 2999-3094.
8. J. Tomasi and M. Persico, *Chemical Reviews (Washington, DC, United States)*, 1994, **94**, 2027-2094.
9. M. Cossi, N. Rega, G. Scalmani and V. Barone, *Journal of Computational Chemistry*, 2003, **24**, 669-681.
10. V. Barone and M. Cossi, *The Journal of Physical Chemistry A*, 1998, **102**, 1995-2001.
11. A. V. Marenich, C. J. Cramer and D. G. Truhlar, *The Journal of Physical Chemistry B*, 2009, **113**, 6378-6396.
12. L. Curtiss, P. Redfern, K. Raghavachari, V. Rassolov and J. Pople, *The Journal of Chemical Physics*, 1999, **110**, 4703-4709.
13. J. E. Bartmess, *The Journal of Physical Chemistry*, 1994, **98**, 6420-6424.
14. M. D. Liptak, K. C. Gross, P. G. Seybold, S. Feldgus and G. C. Shields, *Journal of the American Chemical Society*, 2002, **124**, 6421-6427.
15. M. Namazian and M. L. Coote, *The Journal of Physical Chemistry A*, 2007, **111**, 7227-7232.
16. M. Namazian, C. Y. Lin and M. L. Coote, *Journal of Chemical Theory and Computation*, 2010, **6**, 2721-2725.
